# Supplementary material for: CD36 regulates diurnal glucose metabolism and hepatic clock to maintain glucose homeostasis in mice
Source: PubMed Central journal article supplement — iScience. 2023 Mar 29;26(4):106524. doi: 10.1016/j.isci.2023.106524 (PMC10139992; doi:10.1016/j.isci.2023.106524), 2023-03-29
Supplement: mmc1.pdf [file mmc1.pdf]

iScience, Volume 26

## **Supplemental information**

### **CD36 regulates diurnal glucose metabolism and hepatic clock to maintain glucose homeostasis in mice**

**Mengyue Chen, Yang Zhang, Shu Zeng, Danyang Li, Mengyue You, Mingyang Zhang, Zhenyu Wang, Li Wei, Yaxi Chen, and Xiong Z. Ruan**

## Supplemental Text and Figures

Figure S1

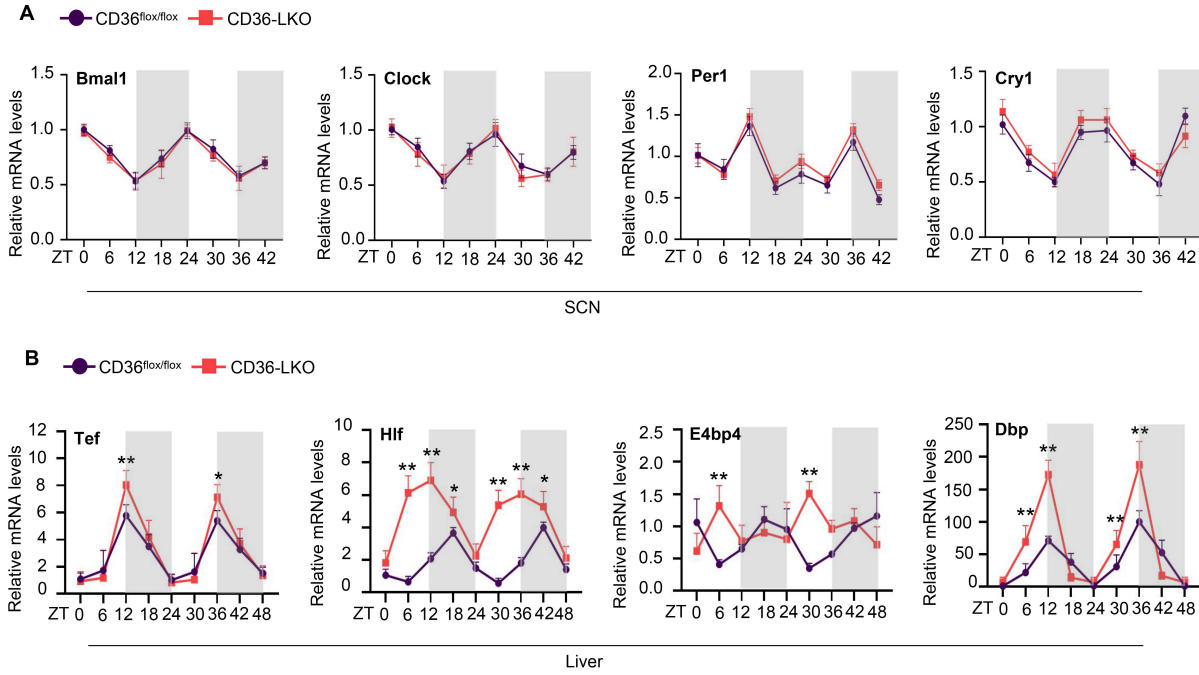

**Figure S1 (related to Figure 1). Effect of CD36-LKO on the gene expression of circadian components in mice SCN and liver.**

(A) The relative mRNA levels of core clock genes in the SCN of CD36<sup>flx/flx</sup> and CD36-LKO mice. (B) The relative mRNA levels of genes downstream of circadian components in the liver of CD36<sup>flx/flx</sup> and CD36-LKO mice. n=4-5 in each group. Data are shown as the mean  $\pm$  SEM. Comparison of different groups was carried out using two-way ANOVA. \*P<0.05 and \*\*P<0.01 indicate a significant difference between the two groups at the corresponding time point. ZT0, the beginning of a subjective circadian period (6:00 AM). Gray shading represents the lights-off period from 6:00 PM to 6:00 AM.

**Figure S2**

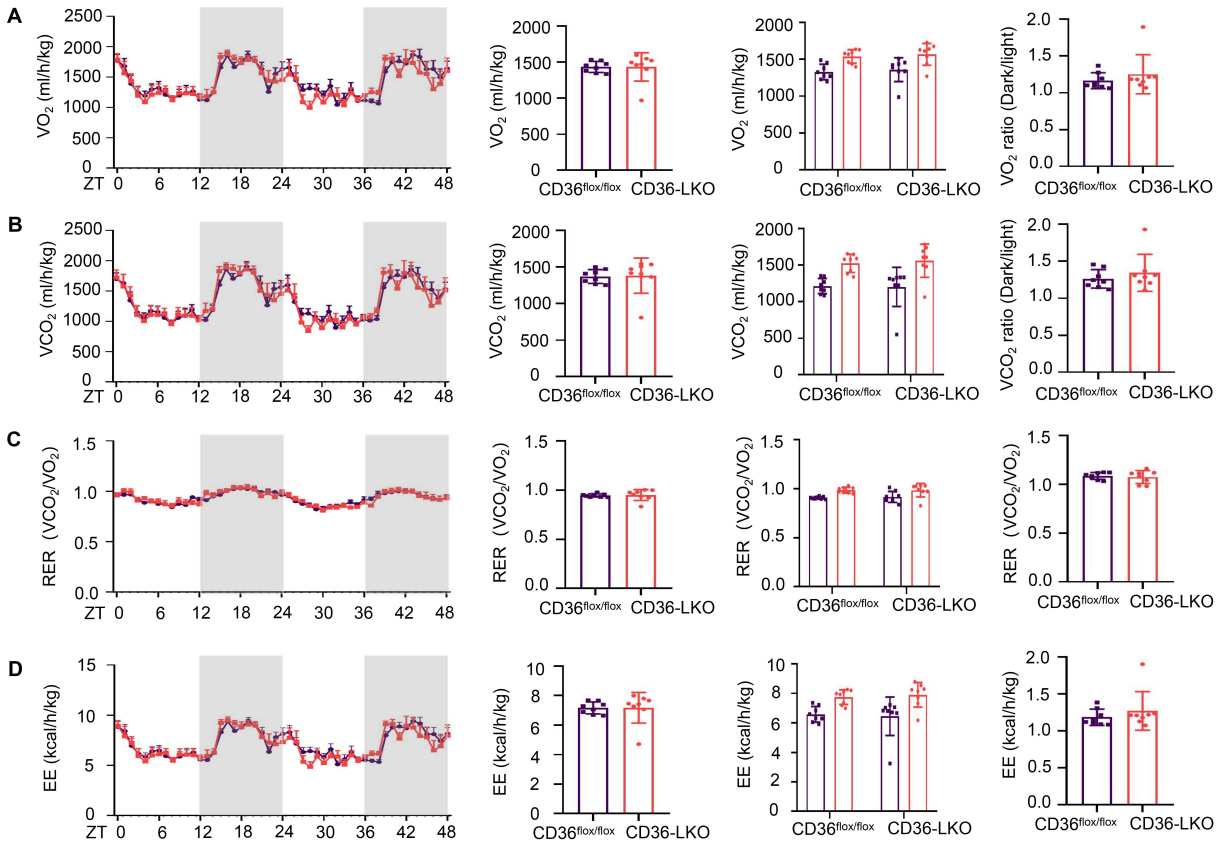

**Figure S2 (related to Figure 2). Effects of CD36-LKO on whole body metabolic status.**

Mouse oxygen consumption ( $VO_2$ ), carbon dioxide output ( $VCO_2$ ), respiratory exchange ratio (RER) and energy expenditure (EE) were monitored for 48 h in 8 to 12-week-old  $CD36^{flox/flox}$  and  $CD36-LKO$  mice. (A)  $VO_2$  per hour in the light/dark cycle, average  $VO_2$  per hour,  $VO_2$  during light and dark phases and dark/light  $VO_2$  ratio in  $CD36^{flox/flox}$  and  $CD36-LKO$  mice. (B)  $VCO_2$  per hour during the light/dark cycle, average  $VCO_2$  per hour,  $VCO_2$  during light and dark phases, and dark/light  $VCO_2$  ratio in  $CD36^{flox/flox}$  and  $CD36-LKO$  mice. (C) RER per hour during the light/dark cycle, average RER per hour, RER during light and dark phases, and dark/light RER ratio in  $CD36^{flox/flox}$  and  $CD36-LKO$  mice. (D) EE per hour during the light/dark cycle, average EE per hour, EE during light and dark periods, and dark/light EE ratio in  $CD36^{flox/flox}$  and  $CD36-LKO$  mice.  $n=8$  in each group. Data are shown as the mean  $\pm$  SEM. Comparison of different groups was carried out using two-tailed unpaired Student's t-test or two-way ANOVA. \* $P<0.05$ , \*\* $P<0.01$  compared with the  $CD36^{flox/flox}$  group; # $P<0.05$ , ### $P<0.01$  compared with the light phase in the identical genotype mice. ZT0, the beginning of a subjective circadian period (6:00 AM). Gray shading represents the lights-off period from 6:00 PM to 6:00 AM.

**Figure S3**

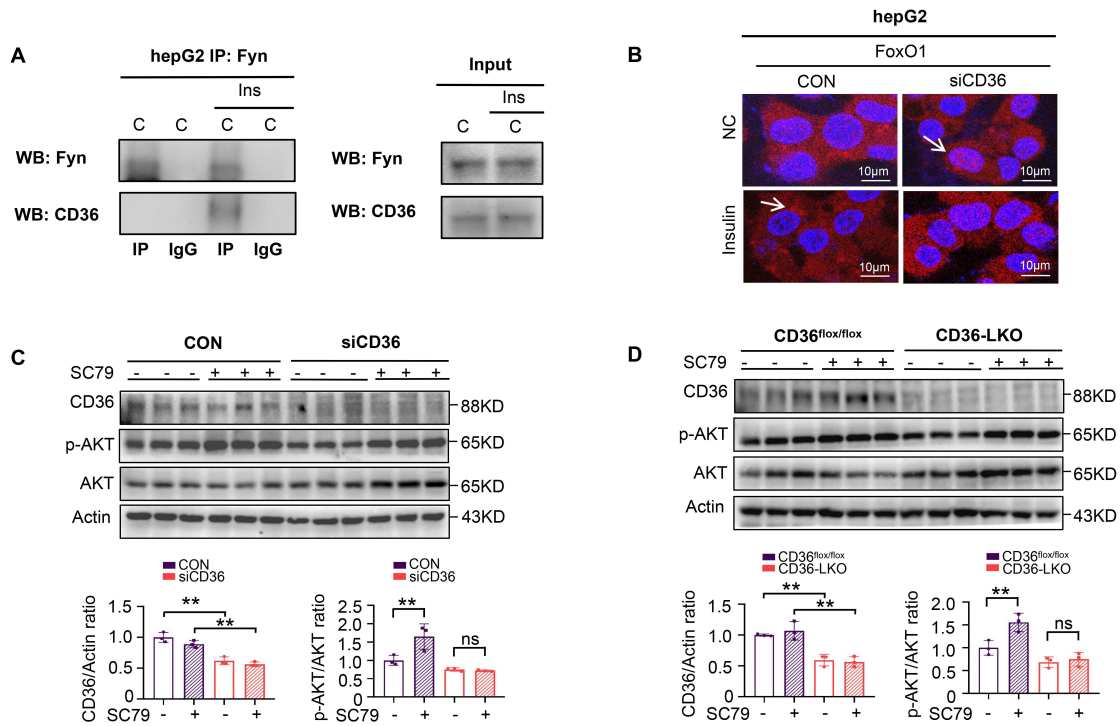

**Figure S3 (related to Figure 5). The binding of CD36 to Fyn promotes the activation of insulin signaling pathway.**

(A) Insulin promotes Fyn association with CD36 in HepG2 cells. Cells were incubated with or without insulin (Ins; 100 nmol/L, 5 min), IP was performed with anti-Fyn antibody, and immunoblotting was used to detect CD36 and Fyn. (B) Effect of CD36 knockdown and the insulin treatment on the cellular localization of FoxO1 in HepG2 cells. Scale bars= 10 $\mu$ m. (C) Western blot analyses and densitometric quantification of the expression levels of AKT and p-AKT (Ser473) in CD36-knockout HepG2 cells treated with SC79. (D) Western blot analyses and densitometric quantification of the expression levels of AKT and p-AKT (Ser473) in the livers of CD36<sup>fllox/fllox</sup> and CD36-LKO mice treated with SC79. n=3 in each group. All data are shown as the mean  $\pm$  SEM. Comparison of different groups was carried out using two-way ANOVA (C and D). \*P<0.05, \*\*P<0.01 versus control groups.

**Figure S4**

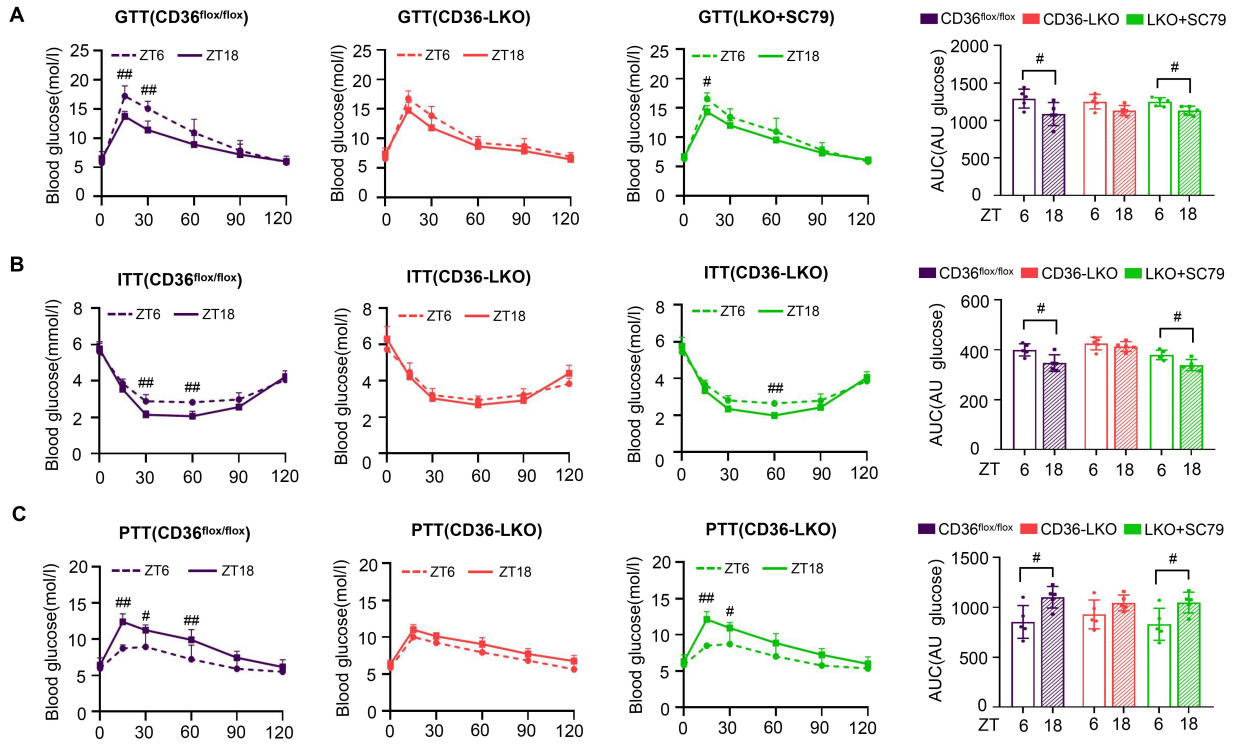

**Figure S4 (related to Figure 7). Injection of SC79 restored the diurnal glucose metabolic rhythm in CD36-LKO mice.**

(A) ITTs were performed at ZT6 and ZT18 in CD36-LKO mice after 12 h of SC79 injection. The area under the curve (AUC) was used to quantify the ITT results. (B) GTTs were performed at ZT6 and ZT18 in CD36-LKO mice after 12 h of SC79 injection. The area under the curve (AUC) was used to quantify the GTT results. (C) PTTs were performed at ZT6 and ZT18 in CD36-LKO mice after 12 h of SC79 injection. The area under the curve (AUC) was used to quantify the PTT results.  $n=5$  in each group. All data are shown as the mean  $\pm$  SEM. Comparison of different groups was carried out using two-way ANOVA. # $P<0.05$ , ## $P<0.01$  compared with ZT6 in the identical genotype mice. ZT, zeitgeber time.

**Figure S5**

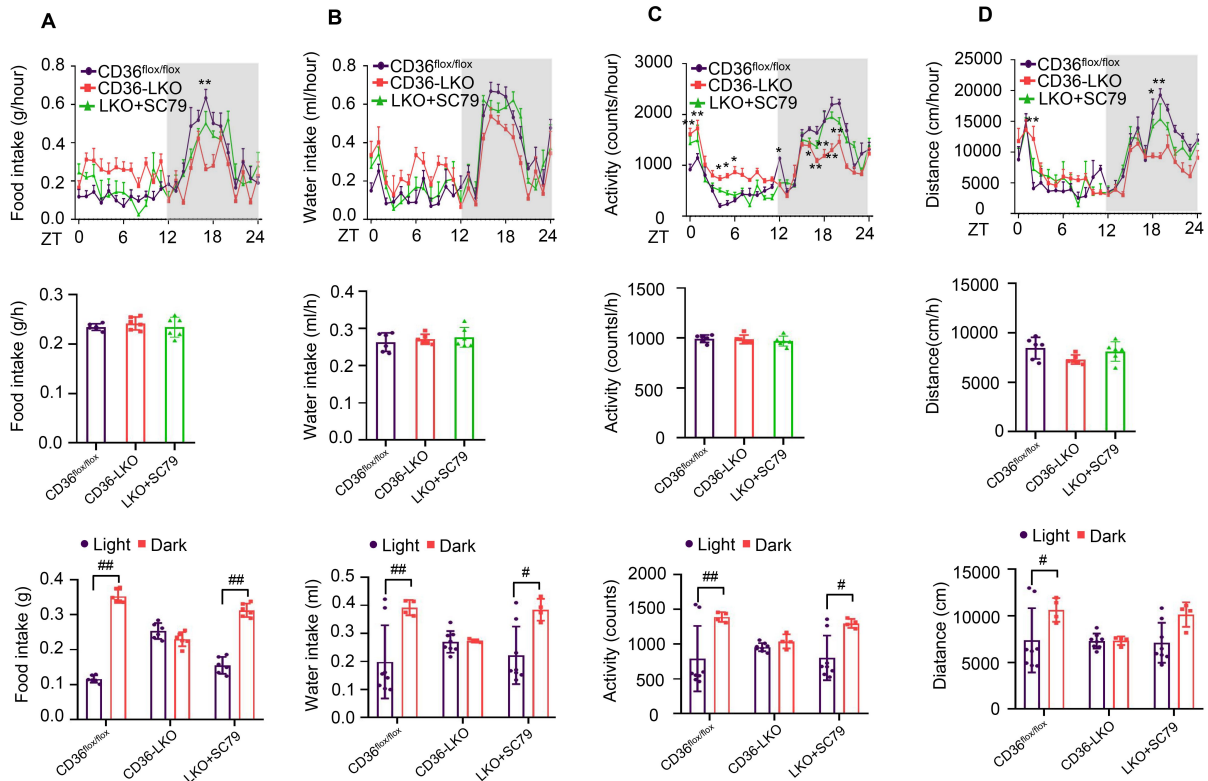

**Figure S5 (related to Figure 7). Effect of SC79 injection on biological behavior rhythms in CD36-LKO mice.**

Food intake, water intake, locomotor activity and movement distance were monitored for 24 h in 8 to 12-week-old CD36<sup>fllox/fllox</sup> and CD36-LKO mice after SC79 injection. (A) Food intake per hour during the light/dark cycle, average food intake per hour and food intake during light and dark phases in CD36<sup>fllox/fllox</sup> and CD36-LKO mice injected with SC79. (B) Water intake per hour during the light/dark cycle, average water intake per hour and water intake during light and dark phases in CD36<sup>fllox/fllox</sup> and CD36-LKO mice injected with SC79. (C) Locomotor activity per hour during the light/dark cycle, average locomotor activity per hour and locomotor activity during light and dark phases in CD36<sup>fllox/fllox</sup> and CD36-LKO mice injected with SC79. (D) Movement distance per hour during the light/dark cycle, average movement distance per hour and movement distance during light and dark phases in CD36<sup>fllox/fllox</sup> and CD36-LKO mice injected with SC79. n=6 in each group. Data are shown as the mean  $\pm$  SEM. Comparison of different groups was carried out using two-tailed unpaired Student's t-test or two-way ANOVA. \*P<0.05, \*\*P<0.01 CD36-LKO group compared with the CD36<sup>fllox/fllox</sup> group; #P<0.05, ###P<0.01 compared with the light phase in the same group. ZT0, the beginning of a subjective circadian period (6:00 AM). Gray shading represents the light-off period from 6:00 PM to 6:00 AM.

**Supplemental Tables**

**Table S1. Information on Primers (mouse) Used in RT-qPCR. Related to STAR Methods.**

| <b>Gene</b>    | <b>Upstream sequences (5'-3')</b> | <b>Downstream sequences (5'-3')</b> |
|----------------|-----------------------------------|-------------------------------------|
| Pklr           | CCGAGATACGCACTGGAGTC              | GTGGTAGTCCACCCCACTG                 |
| PEPCK          | ATGAAAGGCCGCACCATGTA              | GCACAGATATGCCCATCCGA                |
| Gck            | GAGGTCGGCATGATTGTGGG              | ACCATCCGGTCGTACTIONCAG              |
| FoxO1          | AGTGGATGGTGAAGAGCGTG              | GAAGGGACAGATTGTGGCGA                |
| Gys2           | CACCTAGAGCCCACATCACC              | ATTTAGCCGATCCCTCTCAGC               |
| PGC-1a         | AAGCACTTCGGTCATCCCTG              | CAATGAATAGGGCTGCGTGC                |
| Glut2          | GTGTCTGCTACTGCTCTTCTGTG           | GACATCCTCAGTTCCTCTTAGTCTC           |
| G6pase         | GCTGGAGTCTTGTCAGGCAT              | ATCCAAGCGCGAAACCAAAC                |
| Gsk3 $\beta$   | AGTGGTGTGGATCAGTTGGTG             | TGCTCCTGGTGAGTCCTTTGT               |
| Bmal1          | TGACCCTCATGGAAGGTTAGAA            | GGACATTGCATTGCATGTTGG               |
| Clock          | ATGGTGTTTACCGTAAGCTGTAG           | CTCGCGTTACCAGGAAGCAT                |
| Per1           | GAATTGGAGCATATCACATCCGA           | CCCGAAACACATCCCGTTTG                |
| Per2           | CAGGTTGAGGGCATTACCTCC             | AGGCGTCCTTCTTACAGTGAA               |
| Per3           | AAAAGCACACGGATACTGGC              | GGGAGGCTGTAGCTTGTCA                 |
| Cry1           | CACTGGTTCGGAAAGGGACTC             | CTGAAGCAAAAATCGCCACCT               |
| Cry2           | CACTGGTTCGGCAAAGGACTA             | CCACGGGTCGAGGATGTAGA                |
| Rev-erba       | AACAGTCTACGGCAAGGCAA              | GTGCTGAGAAAGGTCACGGA                |
| Rora           | ATTAGGATGTGCCGTGCCTT              | GCGATTTCTGCTTCGGTCAG                |
| CD36           | ATGGGCTGTGATCGGAACTG              | GTCTTCCCAATAAGCATGTCTCC             |
| $\beta$ -actin | TGCCCTGAGGCTCTTTTCC               | TCGTGGATGCCACAGGATT                 |
| Dbp            | GGATGGGTGGGTAGAATCATTGT           | CGGGATCAGGTTCAAAGGTCATT             |
| E4bp4          | TGCTTATGTTTGGACTGGCTTTC           | GACTTCAGCCTCTCATCCATCAA             |
| Hlf            | GCCACAGCCCATGATTAAGAAAG           | TTTGCCAGCTCCTTCCTTAAAT              |
| Tef            | CCGACCTGGTCCTCTCTAGT              | GAGCGTTTAGCTGCCACATT                |

**Table S2. Information on Primers (human) Used in RT-qPCR. Related to STAR Methods.**

| <b>Gene</b>    | <b>Upstream sequences (5'-3')</b> | <b>Downstream sequences (5'-3')</b> |
|----------------|-----------------------------------|-------------------------------------|
| Per1           | AACTCATGACAGCACTTCGAGAG           | CACTGCTGGTAGTATTCCTGGTT             |
| FoxO1          | GGCTGAGGGTTAGTGAGCAG              | TTGCTGCCAAGTCTGACGAA                |
| $\beta$ -actin | GTTGTCGACGACGAGCG                 | GCACAGAGCCTCGCCTT                   |

**Table S3. Information on Primers Used in CHIP-qPCR. Related to STAR Methods.**

| <b>Gene</b> | <b>Upstream sequences (5'-3')</b> | <b>Downstream sequences (5'-3')</b> |
|-------------|-----------------------------------|-------------------------------------|
| Per1-P1     | CCACATTCCGAGGCAGCTT               | TGCATAGACAAAAGGCTCCAG               |
| Per1-P2     | AGTGAATGAGACAGATGACGTTCC          | GAAGCCAGGACTACAGAGGGA               |
| Per1-P3     | CTCAAGGACCACCCATCTCAT             | TGGAAGGGAGGAGAGAGGGAGATA            |
